# Supplementary material
Source: PubMed Central journal article supplement (PMC7588043)
Supplement: ct0c00328_si_001.pdf [file ct0c00328_si_001.pdf]

# Supporting information to "A modified interaction-strength interpolation method as an important step towards self-consistent calculations."

Szymon Śmiga<sup>a</sup>, Lucian A. Constantin<sup>b</sup>

*a) Institute of Physics, Faculty of Physics, Astronomy and Informatics,  
Nicolaus Copernicus University,  
Grudziadzka 5, 87-100 Toruń, Poland*

*b) Center for Biomolecular Nanotechnologies @UNILE,  
Istituto Italiano di Tecnologia (IIT),  
Via Barsanti, 73010 Arnesano (LE), Italy*

May 28, 2020

## Contents

|          |                                               |           |
|----------|-----------------------------------------------|-----------|
| <b>1</b> | <b>Correlation energies</b>                   | <b>2</b>  |
| <b>2</b> | <b>Atomization energies</b>                   | <b>3</b>  |
| <b>3</b> | <b>Reaction energies</b>                      | <b>6</b>  |
| <b>4</b> | <b>Vertical ionization potentials</b>         | <b>9</b>  |
| <b>5</b> | <b>Binding energies</b>                       | <b>10</b> |
| <b>6</b> | <b>GL2 correlation energies</b>               | <b>11</b> |
| <b>7</b> | <b>Binding energies on top of HF orbitals</b> | <b>12</b> |

# 1 Correlation energies

TABLE S1: Correlation energies (in Hartree) corresponding to various methods. The last lines report the mean absolute error (MAE) and mean absolute relative error (MARE) calculated with respect CCSD(T) data. All calculation have been performed with fully uncontacted cc-pVTZ basis set. <sup>a</sup>) with TPSS-GL2

|                               | CCSD(T)   | MP2       | OEP2-sc   | @OEPx     |           |           |                   |           |
|-------------------------------|-----------|-----------|-----------|-----------|-----------|-----------|-------------------|-----------|
|                               |           |           |           | GL2       | ISI       | mISI      | mISI <sup>a</sup> | ACSC      |
| He                            | -0.039660 | -0.033722 | -0.035329 | -0.044363 | -0.036901 | -0.037880 | -0.040245         | -0.037672 |
| Li                            | -0.037664 | -0.032766 | -0.033113 | -0.039994 | -0.036625 | -0.037035 | -0.049778         | -0.047631 |
| Be                            | -0.086245 | -0.066051 | -0.070758 | -0.113802 | -0.093827 | -0.093499 | -0.092874         | -0.079241 |
| B                             | -0.109096 | -0.084970 | -0.087452 | -0.134885 | -0.115990 | -0.115052 | -0.116710         | -0.106086 |
| C                             | -0.135090 | -0.111021 | -0.113715 | -0.161406 | -0.142634 | -0.141143 | -0.150590         | -0.138592 |
| N                             | -0.162907 | -0.143243 | -0.145089 | -0.191277 | -0.172266 | -0.170403 | -0.191004         | -0.175988 |
| O                             | -0.214710 | -0.194242 | -0.197836 | -0.254493 | -0.227236 | -0.223866 | -0.238568         | -0.227975 |
| F                             | -0.271139 | -0.254910 | -0.259624 | -0.326869 | -0.290263 | -0.285027 | -0.295228         | -0.283542 |
| Ne                            | -0.330714 | -0.323416 | -0.352746 | -0.405145 | -0.358920 | -0.351796 | -0.358131         | -0.341914 |
| BeH                           | -0.084363 | -0.070275 | -0.071935 | -0.097580 | -0.086060 | -0.086295 | -0.101597         | -0.095427 |
| OH                            | -0.271866 | -0.251585 | -0.258501 | -0.340946 | -0.293686 | -0.287072 | -0.287883         | -0.274333 |
| NH <sub>2</sub>               | -0.258278 | -0.233404 | -0.240494 | -0.327428 | -0.276327 | -0.269931 | -0.281918         | -0.266560 |
| NH                            | -0.209239 | -0.184706 | -0.190263 | -0.254288 | -0.221721 | -0.218033 | -0.233549         | -0.220886 |
| NO                            | -0.523898 | -0.495963 | -0.535165 | -0.723276 | -0.598771 | -0.578557 | -0.516251         | -0.483107 |
| PH <sub>2</sub>               | -0.341964 | -0.308711 | -0.321864 | -0.422856 | -0.399211 | -0.395922 | -0.636401         | -0.593883 |
| O <sub>2</sub>                | -0.560216 | -0.538007 | -0.577888 | -0.770850 | -0.644323 | -0.623286 | -0.553919         | -0.521423 |
| S <sub>2</sub>                | -0.701416 | -0.655289 | -0.689624 | -0.918035 | -0.865781 | -0.857520 | -1.307655         | -1.210837 |
| SiH <sub>2</sub>              | -0.288381 | -0.261218 | -0.272959 | -0.347422 | -0.330311 | -0.328249 | -0.561487         | -0.530983 |
| C <sub>2</sub> H <sub>5</sub> | -0.470713 | -0.422178 | -0.438171 | -0.601636 | -0.501556 | -0.489244 | -0.553714         | -0.516717 |
| CH <sub>2</sub>               | -0.216482 | -0.184017 | -0.167273 | -0.278421 | -0.230092 | -0.225144 | -0.235491         | -0.216760 |
| CH <sub>3</sub>               | -0.231320 | -0.203690 | -0.209144 | -0.287709 | -0.242062 | -0.237557 | -0.271475         | -0.255391 |
| CN                            | -0.428080 | -0.368123 | -0.467363 | -0.541471 | -0.454037 | -0.441432 | -0.416596         | -0.384800 |
| COH                           | -0.492578 | -0.464970 | -0.496161 | -0.670735 | -0.556537 | -0.538997 | -0.503263         | -0.469853 |
| CH <sub>4</sub>               | -0.273230 | -0.244444 | -0.251094 | -0.348835 | -0.286640 | -0.280100 | -0.316937         | -0.296330 |
| LiF                           | -0.379001 | -0.368097 | -0.383314 | -0.487876 | -0.418808 | -0.409232 | -0.386879         | -0.366502 |
| Li <sub>2</sub>               | -0.107293 | -0.087716 | -0.089084 | -0.137012 | -0.116623 | -0.117194 | -0.133762         | -0.114303 |
| F <sub>2</sub>                | -0.654028 | -0.630457 | -0.664311 | -0.875886 | -0.742294 | -0.719318 | -0.635842         | -0.601346 |
| CO                            | -0.476203 | -0.452759 | -0.367822 | -0.659650 | -0.544370 | -0.526297 | -0.472407         | -0.438719 |
| CH <sub>2</sub>               | -0.216482 | -0.184017 | -0.189700 | -0.278421 | -0.230092 | -0.225144 | -0.235491         | -0.216760 |
| H <sub>2</sub>                | -0.039681 | -0.031980 | -0.032188 | -0.047537 | -0.035415 | -0.037274 | -0.040603         | -0.040486 |
| CS                            | -0.558780 | -0.519899 | -0.556076 | -0.781015 | -0.711328 | -0.699825 | -0.852923         | -0.781827 |
| LiH                           | -0.073802 | -0.060677 | -0.061393 | -0.086328 | -0.073108 | -0.073835 | -0.083349         | -0.076529 |
| N <sub>2</sub>                | -0.491774 | -0.471751 | -0.496969 | -0.708486 | -0.572963 | -0.551501 | -0.485747         | -0.446633 |
| P <sub>2</sub>                | -0.660820 | -0.621909 | -0.653345 | -0.910610 | -0.852628 | -0.843207 | -1.211761         | -1.112793 |
| NaCl                          | -0.579755 | -0.553435 | -0.569281 | -0.729401 | -0.690595 | -0.685110 | -1.101806         | -1.034700 |
| H <sub>2</sub> O              | -0.329409 | -0.314495 | -0.323122 | -0.433049 | -0.361010 | -0.350379 | -0.340403         | -0.321116 |
| MAE [mH]                      |           | 24.39     | 18.43     | 95.35     | 42.28     | 34.85     | 85.91             | 73.58     |
| MARE [%]                      |           | 10.47     | 8.73      | 26.57     | 10.35     | 8.28      | 21.44             | 16.91     |

## 2 Atomization energies

TABLE S2: Atomization energies (in kcal/mol) of 27 molecules from G2 set corresponding to various methods. The last lines report the mean absolute error (MAE) and mean absolute relative error (MARE) calculated with respect CCSD(T) data. All calculation have been performed with fully uncontacted cc-pVTZ basis set. <sup>a)</sup> with TPSS-GL2

|                               | CCSD(T) | MP2     | OEP2-sc | @OEPx   |         |         |                   | ACSC    |
|-------------------------------|---------|---------|---------|---------|---------|---------|-------------------|---------|
|                               |         |         |         | GL2     | ISI     | mISI    | mISI <sup>a</sup> |         |
| BeH                           | -49.15  | -52.98  | -53.01  | -39.92  | -42.19  | -42.17  | -52.6             | -57.28  |
| OH                            | -103.44 | -103.55 | -104.22 | -121.36 | -105.77 | -103.37 | -95.08            | -93.23  |
| NH <sub>2</sub>               | -176.28 | -173.01 | -174.07 | -200.95 | -174.72 | -171.15 | -166.6            | -166.39 |
| NH                            | -79.69  | -76.64  | -77.45  | -89.6   | -78.05  | -76.54  | -73.78            | -75.26  |
| NO                            | -144.92 | -152.57 | -162.43 | -224.93 | -175.84 | -166.44 | -105.19           | -100.46 |
| PH <sub>2</sub>               | -149.07 | -142.01 | -143.65 | -159.39 | -147.72 | -146.1  | -153.92           | -147.3  |
| O <sub>2</sub>                | -115.11 | -126.86 | -135.52 | -195.27 | -150.09 | -141.11 | -79.13            | -72.04  |
| S <sub>2</sub>                | -94.41  | -100.09 | -105.18 | -142.12 | -131.3  | -129.07 | -103.31           | -85.56  |
| SiH <sub>2</sub>              | -129.98 | -126.63 | -127.48 | -132.36 | -123.82 | -122.8  | -137.63           | -134.82 |
| C <sub>2</sub> H <sub>5</sub> | -593.95 | -593.7  | -596    | -641.03 | -586.57 | -578.9  | -609.65           | -601.49 |
| CH <sub>2</sub>               | -187.46 | -187.02 | -187.52 | -195.64 | -182.36 | -180.91 | -195.93           | -194.39 |
| CH <sub>3</sub>               | -303    | -300.77 | -301.33 | -321.41 | -295.41 | -292.43 | -309.07           | -306.51 |
| CN                            | -171.62 | -161.44 | -194.38 | -207.01 | -175.86 | -170.05 | -135.61           | -132.61 |
| COH                           | -271.53 | -282.15 | -288    | -340.18 | -294.35 | -286.03 | -248.89           | -242.1  |
| CH <sub>4</sub>               | -414.67 | -411.71 | -412.49 | -444.7  | -405.27 | -400.65 | -419.56           | -414.15 |
| LiF                           | -134.05 | -140.47 | -142.08 | -166.01 | -147.76 | -144.77 | -116.35           | -112.24 |
| Li <sub>2</sub>               | -24     | -17.87  | -17.97  | -39.56  | -31     | -30.84  | -25.25            | -15.73  |
| F <sub>2</sub>                | -35.38  | -40.96  | -47.34  | -101.76 | -63.87  | -56.03  | 9.16              | 16.14   |
| CO                            | -253.5  | -266.73 | -271.54 | -325.78 | -282.32 | -274.03 | -225.06           | -218.1  |
| CH <sub>2</sub>               | -177.08 | -171.81 | -172.29 | -198.61 | -173.98 | -171.08 | -172.5            | -168.28 |
| H <sub>2</sub>                | -108.64 | -103.8  | -103.85 | -113.57 | -99.87  | -100.31 | -103.26           | -103.19 |
| CS                            | -164.1  | -172.12 | -178.58 | -241.72 | -220.75 | -215.95 | -151.98           | -136.4  |
| LiH                           | -56.86  | -51.69  | -51.75  | -63.2   | -53.97  | -53.81  | -52.21            | -49.28  |
| N <sub>2</sub>                | -218.75 | -230.86 | -235.74 | -317.06 | -255.88 | -244.75 | -177.64           | -171.94 |
| P <sub>2</sub>                | -104.75 | -107.94 | -112.76 | -181.65 | -163.77 | -160.21 | -103.6            | -81.6   |
| NaCl                          | -93.3   | -96.27  | -96.1   | -111.04 | -106.48 | -105.61 | -100.02           | -92.66  |
| H <sub>2</sub> O              | -226.28 | -229.77 | -230.7  | -265.92 | -231.73 | -226.45 | -211.82           | -206.37 |
| MAE                           |         | 5.51    | 8.01    | 37.75   | 16.43   | 14.51   | 14.83             | 17.76   |
| MARE[%]                       |         | 5.19    | 7.32    | 31.59   | 15.03   | 13.00   | 13.22             | 17.16   |

TABLE S3: Atomization energies (in kcal/mol) of AE6 set corresponding to various methods. The last lines report the mean absolute error (MAE) and mean absolute relative error (MARE) calculated with respect CCSD(T) data. All calculation have been performed with fully uncontacted cc-pVTZ basis set. <sup>a)</sup> with TPSS-GL2

|                                              | CCSD(T) | MP2     | OEP2-sc | @OEPx   |         |         |                   | ACSC    |
|----------------------------------------------|---------|---------|---------|---------|---------|---------|-------------------|---------|
|                                              |         |         |         | GL2     | ISI     | mISI    | mISI <sup>a</sup> |         |
| SiH <sub>4</sub>                             | 318.8   | 310.2   | 311.2   | 332.5   | 324.6   | 323.7   | 333.2             | 318     |
| SiO                                          | 182     | 194.7   | 201     | 255.1   | 230.1   | 225     | 149.9             | 142.5   |
| S <sub>2</sub>                               | 94.3    | 100     | 104.9   | 140.6   | 130     | 127.9   | 104.9             | 86.9    |
| C <sub>3</sub> H <sub>4</sub>                | 690.8   | 703.4   | 707.2   | 789.4   | 723.4   | 712.8   | 704.1             | 680.5   |
| C <sub>2</sub> H <sub>2</sub> O <sub>2</sub> | 618.1   | 641.6   | 651.9   | 761.8   | 671.5   | 654.1   | 586.2             | 564     |
| C <sub>4</sub> H <sub>8</sub>                | -1130.5 | -1140.7 | -1145.6 | -1247.9 | -1150.7 | -1132.3 | -1181.1           | -1144.8 |
| MAE                                          |         | 12.2    | 17.1    | 82.1    | 32.7    | 23.6    | 25.5              | 21      |
| MARE[%]                                      |         | 3.71    | 5.55    | 23.59   | 13.56   | 11.67   | 7.51              | 6.87    |

TABLE S4: Atomization energies (in kcal/mol) of small radicals set corresponding to various methods. The last lines report the mean absolute error (MAE) and mean absolute relative error (MARE) calculated with respect CCSD(T) data. All calculation have been performed with fully uncontacted cc-pVTZ basis set. <sup>a</sup>) with TPSS-GL2

|                               | CCSD(T) | MP2    | OEP2-sc | @OEPx  |        |        |                   |        |
|-------------------------------|---------|--------|---------|--------|--------|--------|-------------------|--------|
|                               |         |        |         | GL2    | ISI    | mISI   | mISI <sup>a</sup> | ACSC   |
| BH <sub>2</sub>               | -167.4  | -167.9 | -168.0  | -169.2 | -163.6 | -162.8 | -177.9            | -174.5 |
| BH <sup>+</sup>               | 218.0   | 217.2  | 136.5   | 148.4  | 144.9  | 144.7  | 134.5             | 135.0  |
| BO                            | -189.7  | -204.1 | -209.5  | -240.0 | -211.8 | -206.3 | -167.5            | -164.4 |
| C <sub>2</sub> <sup>-</sup>   | -210.3  | -222.3 | -229.8  | -317.3 | -250.0 | -238.6 | -184.6            | -175.9 |
| CF                            | -129.6  | -134.8 | -140.2  | -165.3 | -143.5 | -139.0 | -110.2            | -107.9 |
| CH                            | -82.0   | -78.4  | -78.8   | -91.1  | -82.0  | -80.7  | -80.1             | -77.7  |
| CN                            | -174.0  | -161.0 | -194.4  | -206.4 | -175.3 | -169.5 | -135.3            | -132.3 |
| CO <sup>+</sup>               | 66.2    | 62.1   | 45.2    | 17.9   | 48.2   | 53.9   | 103.0             | 107.3  |
| F <sub>2</sub> <sup>+</sup>   | 321.0   | 310.8  | 298.7   | 214.7  | 270.3  | 281.2  | 390.1             | 395.4  |
| FH <sup>+</sup>               | 227.4   | 228.7  | 228.3   | 225.9  | 228.1  | 228.7  | 231.0             | 232.8  |
| H <sub>2</sub> O <sup>+</sup> | 60.1    | 61.0   | 60.5    | 44.7   | 57.8   | 60.2   | 65.4              | 70.5   |
| HCO                           | -272.6  | -282.2 | -288.0  | -340.0 | -296.6 | -288.3 | -250.8            | -242.4 |
| HNF                           | -151.4  | -152.5 | -159.5  | -202.1 | -167.2 | -160.1 | -124.2            | -119.3 |
| HOO                           | -169.0  | -170.8 | -183.1  | -234.4 | -190.3 | -181.4 | -134.8            | -125.8 |
| N <sub>2</sub> <sup>+</sup>   | 136.3   | 121.4  | 109.0   | -17.7  | 76.7   | 92.4   | 208.6             | 213.6  |
| NH <sub>2</sub>               | -176.4  | -173.1 | -174.1  | -200.6 | -179.6 | -176.2 | -170.4            | -166.9 |
| NH <sup>+</sup>               | 228.4   | 235.3  | 234.8   | 221.3  | 228.8  | 229.9  | 241.5             | 241.0  |
| NO                            | -146.0  | -152.7 | -162.4  | -225.0 | -175.9 | -166.4 | -105.3            | -100.6 |
| O <sub>2</sub> <sup>+</sup>   | 158.6   | 141.4  | 132.9   | 38.7   | 106.2  | 118.8  | 217.9             | 226.3  |
| OF                            | -49.9   | -50.5  | -63.0   | -99.5  | -68.6  | -62.2  | -12.6             | -7.9   |
| OH                            | -103.5  | -103.6 | -104.3  | -121.2 | -108.1 | -105.7 | -97.0             | -93.5  |
| MAE                           |         | 6.1    | 15.7    | 52.98  | 21.69  | 16.59  | 30.23             | 34.23  |
| MARE[%]                       |         | 3.89   | 12.05   | 89.10  | 16.97  | 12.18  | 32.10             | 46.35  |

TABLE S5: Energies (in kcal/mol) of K9 set corresponding to various methods. The last lines report the mean absolute error (MAE) and mean absolute relative error (MARE) calculated with respect CCSD(T) data. All calculation have been performed with fully uncontacted cc-pVTZ basis set. <sup>a)</sup> with TPSS-GL2

|                                         | CCSD(T) | MP2   | OEP2-sc | @OEPx |       |       |                   | ACSC  |
|-----------------------------------------|---------|-------|---------|-------|-------|-------|-------------------|-------|
|                                         |         |       |         | GL2   | ISI   | mISI  | mISI <sup>a</sup> |       |
| OH + CH <sub>4</sub> → TS               | 7.1     | 8.52  | 2.07    | -7.04 | 2.95  | 5.69  | 18.48             | 20.25 |
| TS → CH <sub>3</sub> + H <sub>2</sub> O | 18.25   | 23.74 | 17.3    | 14.05 | 18.97 | 20.49 | 24.78             | 25.79 |
| H + OH → TS                             | 50.1    | 55.43 | 13.35   | 13.9  | 13.93 | 13.65 | 13.59             | 15.06 |
| TS→O+H <sub>2</sub>                     | 55.19   | 55.63 | 12.93   | 6.27  | 11.12 | 14.03 | 23.15             | 24.71 |
| H+H <sub>2</sub> S → TS                 | 4.1     | 6.77  | 5.66    | 3.09  | 4.06  | 4.16  | 5.94              | 6.5   |
| TS → H <sub>2</sub> +SH                 | 18.93   | 17.37 | 16.15   | 9.92  | 8.03  | 10.15 | 11.73             | 18.62 |
|                                         | MAE     | 2.82  | 14.89   | 18.91 | 16.01 | 15.01 | 15.92             | 14.82 |
|                                         | MARE[%] | 22.46 | 46.45   | 75.88 | 45.52 | 37.87 | 68.32             | 68.63 |

### 3 Reaction energies

TABLE S6: Hydrogen transfer reactions energies (in kcal/mol) corresponding to various methods. The last lines report the mean absolute error (MAE) and mean absolute relative error (MARE) calculated with respect CCSD(T) data. All calculation have been performed with fully uncontacted cc-pVTZ basis set. <sup>a)</sup> with TPSS-GL2

|                                                                                                                                      | CCSD(T) | MP2    | OEP2-sc | @OEPx  |        |        |                   |        |
|--------------------------------------------------------------------------------------------------------------------------------------|---------|--------|---------|--------|--------|--------|-------------------|--------|
|                                                                                                                                      |         |        |         | GL2    | ISI    | mISI   | mISI <sup>a</sup> | ACSC   |
| CH <sub>3</sub> + H <sub>2</sub> → CH <sub>4</sub> + H                                                                               | -3.03   | -7.15  | -7.34   | -9.7   | -6.96  | -4.52  | -6.02             | -4.62  |
| C <sub>2</sub> H + H <sub>2</sub> → C <sub>2</sub> H <sub>2</sub> + H                                                                | -30.55  | -51.11 | -34.73  | -71.78 | -54.8  | -49.79 | -37.39            | -35.1  |
| C <sub>2</sub> H <sub>3</sub> + H <sub>2</sub> → C <sub>2</sub> H <sub>4</sub> + H                                                   | -9.43   | -20.85 | -12.97  | -29.19 | -21.58 | -18.16 | -14.63            | -12.76 |
| C(CH <sub>3</sub> ) <sub>3</sub> + H <sub>2</sub> → HC(CH <sub>3</sub> ) <sub>3</sub> + H                                            | 4.81    | -0.29  | 0.9     | -2.43  | 0.46   | 3.22   | 2.52              | 3.54   |
| C <sub>6</sub> H <sub>5</sub> + H <sub>2</sub> → C <sub>6</sub> H <sub>6</sub> + H                                                   | -12.05  | -41.48 | -12.79  | -64.98 | -42.71 | -36.44 | -15.78            | -10.14 |
| C <sub>2</sub> H + C <sub>2</sub> H <sub>4</sub> → C <sub>2</sub> H <sub>2</sub> + C <sub>2</sub> H <sub>3</sub>                     | -21.11  | -30.27 | -21.76  | -42.6  | -33.22 | -31.63 | -22.76            | -22.34 |
| C(CH <sub>3</sub> ) <sub>3</sub> + C <sub>2</sub> H <sub>4</sub> → HC(CH <sub>3</sub> ) <sub>3</sub> + C <sub>2</sub> H <sub>3</sub> | 14.24   | 20.55  | 13.86   | 26.76  | 22.05  | 21.38  | 17.15             | 16.3   |
| C <sub>6</sub> H <sub>5</sub> + C <sub>2</sub> H <sub>4</sub> → C <sub>6</sub> H <sub>6</sub> + C <sub>2</sub> H <sub>3</sub>        | -2.62   | -20.63 | 0.17    | -35.79 | -21.12 | -18.28 | -1.16             | 2.62   |
| C <sub>2</sub> H + HC(CH <sub>3</sub> ) <sub>3</sub> → C <sub>2</sub> H <sub>2</sub> + C(CH <sub>3</sub> ) <sub>3</sub>              | -35.36  | -50.82 | -35.63  | -69.36 | -55.26 | -53    | -39.91            | -38.64 |
| C <sub>6</sub> H <sub>5</sub> + HC(CH <sub>3</sub> ) <sub>3</sub> → C <sub>6</sub> H <sub>6</sub> + C(CH <sub>3</sub> ) <sub>3</sub> | -16.86  | -41.19 | -13.69  | -62.55 | -43.17 | -39.66 | -18.31            | -13.68 |
| C <sub>2</sub> H + C <sub>6</sub> H <sub>6</sub> → C <sub>2</sub> H <sub>2</sub> + C <sub>6</sub> H <sub>5</sub>                     | -18.5   | -9.63  | -21.94  | -6.81  | -12.09 | -13.35 | -21.6             | -24.96 |
| C <sub>2</sub> H + CH <sub>4</sub> → C <sub>2</sub> H <sub>2</sub> + CH <sub>3</sub>                                                 | -27.51  | -43.96 | -27.39  | -62.08 | -47.84 | -45.27 | -31.37            | -30.48 |
| C <sub>2</sub> H <sub>3</sub> + CH <sub>4</sub> → C <sub>2</sub> H <sub>4</sub> + CH <sub>3</sub>                                    | -6.4    | -13.69 | -5.63   | -19.48 | -14.62 | -13.64 | -8.61             | -8.13  |
| C(CH <sub>3</sub> ) <sub>3</sub> + CH <sub>4</sub> → HC(CH <sub>3</sub> ) <sub>3</sub> + CH <sub>3</sub>                             | 7.84    | 6.86   | 8.24    | 7.27   | 7.42   | 7.74   | 8.54              | 8.17   |
| C <sub>6</sub> H <sub>5</sub> + CH <sub>4</sub> → C <sub>6</sub> H <sub>6</sub> + CH <sub>3</sub>                                    | -9.02   | -34.32 | -5.45   | -55.28 | -35.75 | -31.92 | -9.77             | -5.51  |
|                                                                                                                                      | MAE     | 13.52  | 2.15    | 25.39  | 14.8   | 12.16  | 2.91              | 2.84   |
|                                                                                                                                      | MARE[%] | 143.54 | 32.56   | 259.46 | 150.18 | 118.95 | 29.49             | 33.94  |

TABLE S7: Isomerization/reaction energies (in kcal/mol) corresponding to various methods. The last lines report the mean absolute error (MAE) and mean absolute relative error (MARE) calculated with respect CCSD(T) data. All calculation have been performed with fully uncontacted cc-pVTZ basis set. <sup>a)</sup> with TPSS-GL2

|                                                                               | CCSD(T) | MP2     | OEP2-sc | @OEPx   |         |              |                   |         |
|-------------------------------------------------------------------------------|---------|---------|---------|---------|---------|--------------|-------------------|---------|
|                                                                               |         |         |         | GL2     | ISI     | mISI         | mISI <sup>a</sup> | ACSC    |
| cis-2-butene→trans-2-butene                                                   | -1.331  | -1.596  | -1.671  | -1.958  | -1.658  | -1.508       | -0.838            | -1.188  |
| methylformate→acetic acid                                                     | -16.528 | -17.43  | -16.406 | -15.848 | -16.32  | -16.398      | -21.717           | -20.579 |
| Propanone → Propanal                                                          | -10.543 | -10.823 | -11.012 | -9.651  | -10.339 | -10.404      | -11.573           | -11.506 |
| Acetylenediol → Glioxal                                                       | 46.733  | 44.385  | 46.563  | 47.096  | 46.985  | 47.191       | 37.038            | 39.885  |
| Water-methanol 1 → Water-methanol 2                                           | -0.098  | -0.107  | -0.121  | -0.213  | -0.133  | -0.117       | 0.001             | 0.075   |
| Methylenecyclopropene → Cumulene                                              | 15.788  | 12.248  | 15.362  | 26.964  | 20.04   | 18.997       | -8.516            | -4.995  |
| Methylenecyclopropene → Cyclobutadiene                                        | -58.429 | -61.826 | -58.475 | 77.872  | 25.305  | 16.937       | -52.645           | -50.569 |
| Methylenecyclopropene → Vinylacetylene                                        | 23.81   | 23.772  | 23.798  | 35.923  | 29.722  | 28.809       | 2.495             | 6.395   |
| Cumulene → Cyclobutadiene                                                     | -74.217 | -74.075 | -73.838 | 50.908  | 5.265   | -2.06        | -44.129           | -45.574 |
| Cumulene → Vinylacetylene                                                     | 8.022   | 11.524  | 8.436   | 8.959   | 9.682   | 9.812        | 11.011            | 11.39   |
| Cyclobutadiene → Vinylacetylene                                               | 82.239  | 85.599  | 82.274  | -41.949 | 4.417   | 11.872       | 55.14             | 56.964  |
| (H <sub>2</sub> O) <sub>6</sub> book → (H <sub>2</sub> O) <sub>6</sub> book2  | -1.413  | -1.449  | -1.383  | -0.872  | -1.263  | -1.297       | -2.003            | -2.032  |
| (H <sub>2</sub> O) <sub>6</sub> book → (H <sub>2</sub> O) <sub>6</sub> ring   | -2.138  | -2.096  | -2.762  | -4.507  | -2.963  | -2.316       | 0.291             | 0.292   |
| (H <sub>2</sub> O) <sub>6</sub> book → (H <sub>2</sub> O) <sub>6</sub> prism  | 2.226   | 2.076   | 2.82    | 4.558   | 3.109   | 2.362        | -0.016            | -0.226  |
| (H <sub>2</sub> O) <sub>6</sub> book → (H <sub>2</sub> O) <sub>6</sub> cage   | 1.459   | 1.4     | 1.909   | 3.211   | 2.096   | 1.565        | -0.291            | -0.416  |
| (H <sub>2</sub> O) <sub>6</sub> book2 → (H <sub>2</sub> O) <sub>6</sub> ring  | -0.724  | -0.647  | -1.379  | -3.635  | -1.701  | -1.018       | 2.295             | 2.324   |
| (H <sub>2</sub> O) <sub>6</sub> book2 → (H <sub>2</sub> O) <sub>6</sub> prism | 3.639   | 3.525   | 4.203   | 5.43    | 4.372   | 3.66         | 1.988             | 1.806   |
| (H <sub>2</sub> O) <sub>6</sub> book2 → (H <sub>2</sub> O) <sub>6</sub> cage  | 2.872   | 2.849   | 3.292   | 4.083   | 3.359   | 2.862        | 1.713             | 1.616   |
| (H <sub>2</sub> O) <sub>6</sub> ring → (H <sub>2</sub> O) <sub>6</sub> prism  | 4.363   | 4.172   | 5.582   | 9.065   | 6.072   | 4.678        | -0.307            | -0.517  |
| (H <sub>2</sub> O) <sub>6</sub> ring → (H <sub>2</sub> O) <sub>6</sub> cage   | 3.596   | 3.496   | 4.671   | 7.718   | 5.06    | 3.881        | -0.582            | -0.708  |
| (H <sub>2</sub> O) <sub>6</sub> prism → (H <sub>2</sub> O) <sub>6</sub> cage  | -0.767  | -0.676  | -0.911  | -1.347  | -1.013  | -0.797       | -0.275            | -0.19   |
|                                                                               | MAE     | 0.89    | 0.39    | 20.71   | 12.48   | <b>10.97</b> | 7.16              | 6.61    |
|                                                                               | MARE[%] | 7.97    | 16.59   | 96.60   | 42.74   | <b>23.87</b> | 82.39             | 84.89   |

TABLE S8: Close-shell reaction energies (in kcal/mol) corresponding to various methods. The last lines report the mean absolute error (MAE) and mean absolute relative error (MARE) calculated with respect CCSD(T) data. All calculation have been performed with fully uncontacted cc-pVTZ basis set. <sup>a)</sup> with TPSS-GL2

|                                                                              | CCSD(T) | MP2     | OEP2-sc | @OEPx  |         |         |                   |         |
|------------------------------------------------------------------------------|---------|---------|---------|--------|---------|---------|-------------------|---------|
|                                                                              |         |         |         | GL2    | ISI     | mISI    | mISI <sup>a</sup> | ACSC    |
| F <sub>2</sub> O+H <sub>2</sub> →F <sub>2</sub> +H <sub>2</sub> O            | -66.83  | -70.1   | -62.78  | -51.36 | -61.53  | -62.39  | -84.4             | -84.06  |
| H <sub>2</sub> O <sub>2</sub> +H <sub>2</sub> →2H <sub>2</sub> O             | -84.27  | -88.41  | -85.31  | -73    | -81.29  | -81.78  | -100.43           | -99.96  |
| CO+H <sub>2</sub> →CH <sub>2</sub> O                                         | -3.55   | -4      | -3.51   | 2.81   | -0.66   | 0.76    | -18.33            | -15.88  |
| CO+3H <sub>2</sub> → CH <sub>4</sub> +H <sub>2</sub> O                       | -61.55  | -63.33  | -60.11  | -43.96 | -54.98  | -52.04  | -96.55            | -92.87  |
| N <sub>2</sub> +3H <sub>2</sub> →2NH <sub>3</sub>                            | -34.7   | -34.22  | -31.3   | -3.05  | -21.26  | -19.43  | -69.6             | -68.37  |
| N <sub>2</sub> O+H <sub>2</sub> →N <sub>2</sub> +H <sub>2</sub> O            | -79.86  | -75.13  | -65.2   | -45.43 | -66.06  | -68.82  | -91.89            | -94.06  |
| HNO <sub>2</sub> +3H <sub>2</sub> →2H <sub>2</sub> O+NH <sub>3</sub>         | -117.82 | -121.89 | -108.26 | -76.06 | -102.67 | -103.56 | -158.59           | -157.86 |
| C <sub>2</sub> H <sub>2</sub> +H <sub>2</sub> →C <sub>2</sub> H <sub>4</sub> | -49.62  | -47.55  | -47.29  | -33.33 | -42.29  | -41.8   | -64.31            | -64.49  |
| CH <sub>2</sub> -CO+2H <sub>2</sub> →CH <sub>2</sub> O+CH <sub>4</sub>       | -42.64  | -40.51  | -37.57  | -28    | -37.12  | -36.09  | -54.95            | -55.98  |
| BH <sub>3</sub> +3HF→BF <sub>3</sub> +3H <sub>2</sub>                        | -98.1   | -99.17  | -102.65 | -99.81 | -96.09  | -98.95  | -86.38            | -91.4   |
| HCOOH→CO <sub>2</sub> +H <sub>2</sub>                                        | 1.17    | -1.4    | -3.19   | -11.82 | -5.03   | -6.04   | 13.36             | 12.72   |
| CO+H <sub>2</sub> O→CO <sub>2</sub> +H <sub>2</sub>                          | -7.67   | -11.7   | -16.35  | -17.36 | -12.03  | -12.05  | -8.49             | -7.72   |
| C <sub>2</sub> H <sub>2</sub> +HF→CH <sub>2</sub> CHF                        | -28.48  | -25.51  | -27.47  | -13.37 | -21.32  | -21.43  | -40.56            | -39.42  |
| HCN+H <sub>2</sub> O→CO+NH <sub>3</sub>                                      | -13.37  | -10.46  | -11.27  | -0.05  | -7.55   | -8.88   | -14.89            | -17.11  |
| HCN+H <sub>2</sub> O→HCONH <sub>2</sub>                                      | -21.73  | -21.12  | -23.89  | -3.57  | -13.72  | -14.12  | -40.07            | -40.11  |
| HCONH <sub>2</sub> +H <sub>2</sub> O→HCOOH+NH <sub>3</sub>                   | -0.49   | 0.35    | -0.54   | -2.02  | -0.83   | -0.77   | 3.33              | 2.56    |
| HCN+NH <sub>3</sub> →N <sub>2</sub> +CH <sub>4</sub>                         | -40.22  | -39.57  | -40.07  | -40.97 | -41.27  | -41.49  | -41.83            | -41.61  |
| CO+CH <sub>4</sub> →CH <sub>3</sub> CHO                                      | 4.56    | 3.3     | 2.62    | 7.41   | 6.54    | 7.74    | -11.52            | -7.5    |
| N <sub>2</sub> +F <sub>2</sub> →trans-N <sub>2</sub> F <sub>2</sub>          | 17.32   | 18.62   | 11.03   | 20.87  | 19.96   | 21.35   | 10.35             | 12.14   |
| N <sub>2</sub> +F <sub>2</sub> →cis-N <sub>2</sub> F <sub>2</sub>            | 18.83   | 19.51   | 16.19   | 29.07  | 24.62   | 25.33   | 8.61              | 10.21   |
| 2BH <sub>3</sub> →B <sub>2</sub> H <sub>6</sub>                              | -43.09  | -44.58  | -46.07  | -57.72 | -48.1   | -45.68  | -51.06            | -46.96  |
| CH <sub>3</sub> ONO→CH <sub>3</sub> NO <sub>2</sub>                          | -0.89   | -5.61   | -1.7    | -1.85  | -2.11   | -2.22   | -8.16             | -7.29   |
| CH <sub>2</sub> -C→C <sub>2</sub> H <sub>2</sub>                             | -44.28  | -51.94  | -49.9   | -59.35 | -51.99  | -50.74  | -45.45            | -44.31  |
| Allene→propyne                                                               | -1.1    | -4.43   | -3.43   | -7.61  | -5.42   | -5.16   | -3.36             | -2.86   |
| Cyclopropene→propyne                                                         | -23.38  | -23.68  | -23.99  | -28.09 | -26.72  | -26.64  | -10.5             | -13.49  |
| Oxirane→CH <sub>3</sub> CHO                                                  | -26.73  | -25.75  | -26.63  | -27.36 | -27.74  | -27.95  | -16.78            | -19.52  |
| Vinlyalcohol→CH <sub>3</sub> CHO                                             | -9.79   | -10     | -10.8   | -11.8  | -11.11  | -11.18  | -9.38             | -9.01   |
| Cyclobutene→1,3-butadiene                                                    | -11.5   | -9.41   | -9.81   | -11.44 | -11.72  | -11.95  | 3.4               | 1.5     |
| 2NH <sub>3</sub> →(NH <sub>3</sub> ) <sub>2</sub>                            | -3.84   | -4      | -4.25   | -5.14  | -4.58   | -3.91   | -2.99             | -3.06   |
| 2H <sub>2</sub> O→(H <sub>2</sub> O) <sub>2</sub>                            | -5.67   | -5.84   | -6.26   | -6.84  | -6.3    | -5.67   | -4.83             | -4.93   |
| 2HF→(HF) <sub>2</sub>                                                        | -4.19   | -4.22   | -4.81   | -5.41  | -4.77   | -4.14   | -3.03             | -3.02   |
|                                                                              | MAE     | 2.04    | 2.98    | 10.57  | 4.66    | 4.63    | 11.4              | 10.32   |
|                                                                              | MARE[%] | 46.79   | 34.53   | 106.30 | 54.47   | 57.34   | 144.77            | 125.72  |

TABLE S9: Open-shell reaction energies (in kcal/mol) corresponding to various methods. The last lines report the mean absolute error (MAE) and mean absolute relative error (MARE) calculated with respect CCSD(T) data. All calculation have been performed with fully uncontacted cc-pVTZ basis set. <sup>a)</sup> with TPSS-GL2

|                                                                                  | CCSD(T)  | MP2    | OEP2-sc | @OEPx  |        |        |                   |        |
|----------------------------------------------------------------------------------|----------|--------|---------|--------|--------|--------|-------------------|--------|
|                                                                                  |          |        |         | GL2    | ISI    | mISI   | mISI <sup>a</sup> | ACSC   |
| HCl+H→Cl+H <sub>2</sub>                                                          | 4.13     | -1.17  | -1.17   | -6.1   | -8.82  | -6.75  | -5.26             | 1.46   |
| H <sub>2</sub> O+F <sub>2</sub> →2HF+O                                           | 13.37    | 12.48  | 6.48    | -42.22 | -8.27  | -1.4   | 49.25             | 54.13  |
| CH <sub>4</sub> +OH→CH <sub>3</sub> +H <sub>2</sub> O                            | 11.19    | 15.28  | 15.31   | 21.27  | 16.1   | 14.86  | 6.26              | 5.5    |
| CH <sub>3</sub> +Cl <sub>2</sub> →CH <sub>3</sub> Cl+Cl                          | 31.32    | 31.85  | 30.75   | 23.28  | 31.5   | 31.39  | 39.76             | 37.69  |
| S+2HCl→H <sub>2</sub> S+Cl <sub>2</sub>                                          | 22.54    | 23.43  | 26.05   | 49.22  | 42.3   | 40.84  | 24.01             | 13.42  |
| N+O <sub>2</sub> →NO+O                                                           | 29.8     | 25.71  | 26.91   | 29.66  | 25.75  | 25.33  | 26.05             | 28.42  |
| 4HCl+O <sub>2</sub> →2H <sub>2</sub> O+2Cl <sub>2</sub>                          | 25.73    | 28.07  | 25.25   | 32.55  | 24.54  | 24.47  | 15.28             | 19.12  |
| 2NO→N <sub>2</sub> +O <sub>2</sub>                                               | 44.03    | 52.59  | 46.4    | 62.47  | 54.29  | 52.99  | 46.39             | 43.05  |
| 2H <sub>2</sub> O <sub>2</sub> →2H <sub>2</sub> O+O <sub>2</sub>                 | 48.36    | 51.74  | 52.44   | 36.69  | 49.01  | 52.47  | 62.86             | 65.6   |
| Cl <sub>2</sub> +H→HCl+Cl                                                        | 51.36    | 47.33  | 45.3    | 32.29  | 35.7   | 36.57  | 56.1              | 59.07  |
| 2SO <sub>2</sub> +O <sub>2</sub> →2SO <sub>3</sub>                               | 35.68    | 44.58  | 42.25   | 26.62  | 31.9   | 31.95  | 65.02             | 59.18  |
| H <sub>2</sub> S+F <sub>2</sub> →S+2HF                                           | 61.25    | 66.52  | 60.81   | 22.48  | 36.75  | 40.55  | 72.44             | 86.28  |
| NO+N→O+N <sub>2</sub>                                                            | 73.83    | 78.29  | 73.31   | 92.13  | 80.04  | 78.31  | 72.45             | 71.48  |
| 2SiH <sub>3</sub> →Si <sub>2</sub> H <sub>6</sub>                                | 76.97    | 77.02  | 77.61   | 90.38  | 86.03  | 85.11  | 87.9              | 77.18  |
| CH <sub>3</sub> +SH→CH <sub>3</sub> SH                                           | 76.72    | 81.14  | 82.15   | 101.73 | 100.37 | 98.36  | 87.69             | 73.49  |
| CS+O→CO+S                                                                        | 89.4     | 94.62  | 92.98   | 84.05  | 61.57  | 58.08  | 73.08             | 81.7   |
| CH <sub>3</sub> +Cl→CH <sub>3</sub> Cl                                           | 84.47    | 89.49  | 90.46   | 110.72 | 110.61 | 108.73 | 95.53             | 80.34  |
| NH+H→NH <sub>2</sub>                                                             | 96.59    | 96.37  | 96.62   | 111.34 | 99.71  | 98.01  | 94.5              | 91.13  |
| Si+2H <sub>2</sub> →SiH <sub>4</sub>                                             | 101.49   | 102.58 | 103.41  | 105.31 | 112.11 | 108.57 | 119.99            | 111.48 |
| 2C <sub>2</sub> H <sub>4</sub> +O <sub>2</sub> →2CH <sub>3</sub> CHO             | 104.35   | 110.31 | 109.71  | 105.1  | 102.52 | 100.69 | 116.47            | 111.97 |
| NH <sub>2</sub> +H→NH <sub>3</sub>                                               | 113.4    | 115.24 | 115.22  | 129.55 | 116.75 | 114.87 | 113.58            | 108.54 |
| 2H <sub>2</sub> +O <sub>2</sub> →2H <sub>2</sub> O                               | 120.18   | 125.07 | 118.19  | 109.32 | 113.58 | 111.1  | 138               | 134.33 |
| CO <sub>2</sub> +C→2CO                                                           | 128.17   | 129.06 | 128.34  | 156.12 | 138.46 | 135.88 | 108               | 107.2  |
| N <sub>2</sub> H <sub>4</sub> +O <sub>2</sub> →N <sub>2</sub> +2H <sub>2</sub> O | 132.86   | 139.43 | 134.48  | 151.22 | 139.48 | 138.47 | 119.64            | 116.77 |
| 4NH <sub>3</sub> +5O <sub>2</sub> →4NO+6H <sub>2</sub> O                         | 203.1    | 201.58 | 199.16  | 196.92 | 189.65 | 188.46 | 182               | 180.15 |
| 2NH <sub>3</sub> +2NO+O→2N <sub>2</sub> +3H <sub>2</sub> O                       | 247.16   | 269.4  | 260.13  | 321.04 | 278.44 | 270.76 | 223.35            | 212.2  |
|                                                                                  | MAE      | 4.33   | 3.43    | 18.29  | 11.52  | 10.38  | 12.16             | 11.61  |
|                                                                                  | MARE [%] | 12.28  | 12.65   | 51.53  | 34.64  | 29.47  | 35.61             | 30.20  |



## 4 Vertical ionization potentials

TABLE S10: Vertical ionization potential (in eV) corresponding to various methods calculated as an energy difference between the neutral and the ionic species ( $VIP = E(N) - E(N - 1)$ ). The last lines report the mean absolute error (MAE) and mean absolute relative error (MARE) calculated with respect CCSD(T) data. The computational setup, namely basis sets and geometries in case of molecules, is identical as in J. Comput. Chem. 37 (2016), 2081. <sup>a</sup>) with TPSS-GL2

|                                 | CCSD(T) | MP2    | OEP2-sc | @OEPx  |        |        |                   | ACSC   |
|---------------------------------|---------|--------|---------|--------|--------|--------|-------------------|--------|
|                                 |         |        |         | GL2    | ISI    | mISI   | mISI <sup>a</sup> |        |
| Ar                              | -15.63  | -15.77 | -15.75  | -16.31 | -16.01 | -15.94 | -16.06            | -15.76 |
| Be                              | -9.31   | -8.88  | -8.88   | -10.01 | -9.51  | -9.49  | -9.14             | -8.82  |
| C <sub>2</sub> H <sub>2</sub>   | -11.43  | -11.6  | -11.64  | -12.94 | -11.94 | -11.77 | -11.08            | -10.91 |
| C <sub>2</sub> H <sub>4</sub>   | -10.63  | -10.65 | -10.7   | -11.94 | -11.01 | -10.85 | -10.11            | -9.95  |
| C <sub>2</sub> H <sub>6</sub>   | -13.01  | -13.11 | -12.67  | -12.74 | -12.69 | -12.68 | -13.23            | -13.19 |
| CH <sub>2</sub> CF <sub>2</sub> | -10.61  | -10.67 | -10.5   | -11.3  | -10.83 | -10.74 | -10.77            | -10.58 |
| CH <sub>3</sub> CN              | -10.75  | -11.33 | -10.76  | -12.47 | -11.53 | -11.36 | -10.94            | -10.72 |
| CH <sub>4</sub>                 | -14.37  | -14.4  | -14.41  | -14.82 | -14.46 | -14.4  | -14.52            | -14.41 |
| CHF <sub>3</sub>                | -14.59  | -14.61 | -14.23  | -15.87 | -15.93 | -15.94 | -16.95            | -16.85 |
| Cl <sub>2</sub>                 | -11.45  | -11.5  | -11.37  | -11.06 | -11.09 | -11.1  | -12.54            | -12.29 |
| CO <sub>2</sub>                 | -13.7   | -14.63 | -13.85  | -15.51 | -14.63 | -14.46 | -14.03            | -13.79 |
| CO                              | -13.94  | -14.31 | -13.71  | -14.88 | -14.35 | -14.24 | -14.32            | -14.21 |
| CS                              | -11.27  | -11.63 | -11.19  | -14.52 | -13.73 | -13.58 | -11.64            | -11.23 |
| FCN                             | -13.65  | -13.85 | -13.72  | -16.33 | -15.32 | -15.13 | -14.45            | -14.29 |
| H <sub>2</sub> CO               | -10.83  | -11.26 | -10.84  | -12.2  | -11.41 | -11.27 | -10.75            | -10.59 |
| H <sub>2</sub> CS               | -9.29   | -9.57  | -9.28   | -10.73 | -10.27 | -10.19 | -9.48             | -9.16  |
| H <sub>2</sub> O                | -12.5   | -12.69 | -12.7   | -13.6  | -12.86 | -12.73 | -12.16            | -12    |
| HCCF                            | -11.5   | -11.54 | -11.44  | -12.49 | -11.8  | -11.67 | -11.41            | -11.2  |
| HCl                             | -12.59  | -12.67 | -12.66  | -13.27 | -13.07 | -13.03 | -12.97            | -12.65 |
| HCN                             | -13.9   | -14.72 | -14.09  | -16.44 | -15.1  | -14.86 | -13.81            | -13.66 |
| He                              | -24.48  | -24.54 | -24.41  | -24.74 | -24.51 | -24.54 | -24.49            | -24.34 |
| He <sub>2</sub>                 | -24.48  | -24.54 | -24.52  | -24.7  | -24.52 | -24.54 | -24.74            | -24.8  |
| HF                              | -15.96  | -16.18 | -16.2   | -17.05 | -16.38 | -16.26 | -15.57            | -15.41 |
| Mg                              | -7.57   | -7.32  | -7.33   | -8.11  | -7.97  | -7.94  | -7.44             | -7.22  |
| N <sub>2</sub>                  | -15.51  | -15.34 | -15.06  | -13.41 | -14.59 | -14.76 | -16.66            | -16.64 |
| NCCN                            | -13.51  | -14.85 | -13.77  | -12.62 | -13.89 | -14.08 | -16.52            | -16.49 |
| Ne <sub>2</sub>                 | -21.34  | -21.42 | -20.72  | -22.37 | -21.79 | -21.67 | -21.01            | -20.86 |
| Ne                              | -21.47  | -21.67 | -21.69  | -22.39 | -21.83 | -21.72 | -21.04            | -20.88 |
| NH <sub>3</sub>                 | -10.78  | -10.86 | -10.88  | -11.69 | -11.01 | -10.9  | -10.52            | -10.39 |
| OCS                             | -11.18  | -11.75 | -11.27  | -12.6  | -12.1  | -12    | -11.69            | -11.36 |
| P <sub>2</sub>                  | -10.66  | -10.68 | -10.55  | -10.43 | -10.4  | -10.39 | -11.41            | -11.06 |
| SiH <sub>4</sub>                | -12.78  | -12.82 | -12.72  | -13.13 | -13    | -12.98 | -12.99            | -12.88 |
| MAE                             |         | 0.24   | 0.17    | 1.17   | 0.61   | 0.52   | 0.42              | 0.39   |
| MARE [%]                        |         | 2.37   | 1.21    | 9.03   | 4.90   | 4.26   | 3.83              | 3.55   |

## 5 Binding energies

TABLE S11: Binding energies (in kcal/mol) corresponding to various methods. The last lines report the mean absolute error (MAE) and mean absolute relative error (MARE) calculated with respect CCSD(T) data. All calculation have been performed with fully uncontacted cc-pVTZ basis set. <sup>a)</sup> with TPSS-GL2

|                                                | CCSD(T) | MP2    | OEP2-sc | @OEPx  |        |        | ACSC   |        |
|------------------------------------------------|---------|--------|---------|--------|--------|--------|--------|--------|
|                                                |         |        |         | GL2    | ISI    | mISI   |        |        |
| WI                                             |         |        |         |        |        |        |        |        |
| He-Ne                                          | -0.04   | -0.03  | -0.03   | 0.90   | 0.61   | 0.62   | 0.32   | 0.02   |
| He-Ar                                          | -0.06   | -0.06  | -0.06   | 0.83   | 0.72   | 0.72   | 0.51   | 0.05   |
| Ne-Ne                                          | -0.08   | -0.06  | -0.07   | -0.10  | -0.12  | -0.05  | 0.03   | 0.04   |
| Ne-Ar                                          | -0.13   | -0.12  | -0.14   | -0.23  | -0.21  | -0.16  | 0.64   | 0.08   |
| CH <sub>4</sub> -Ne                            | -0.22   | -0.18  | -0.21   | -0.32  | -0.31  | -0.17  | -4.99  | 0.05   |
| C <sub>6</sub> H <sub>6</sub> -Ne              | -0.45   | -0.61  | -0.71   | -1.26  | -0.97  | -0.55  | -6.78  | 0.18   |
| CH <sub>4</sub> -CH <sub>4</sub>               | -0.59   | -0.56  | -0.65   | -1.25  | -0.97  | -0.53  | 0.22   | 0.24   |
| HB6                                            |         |        |         |        |        |        |        |        |
| HF-HF                                          | -4.67   | -4.59  | -4.74   | -4.17  | -4.46  | -4.15  | -4.74  | -4.80  |
| H <sub>2</sub> O-H <sub>2</sub> O              | -5.11   | -5.10  | -5.34   | -5.15  | -5.19  | -4.71  | -4.93  | -5.04  |
| NH <sub>3</sub> -H <sub>2</sub> O              | -6.57   | -6.66  | -7.00   | -7.13  | -6.86  | -6.26  | -6.73  | -6.49  |
| HF-HCN                                         | -7.58   | -7.86  | -8.20   | -7.76  | -7.77  | -7.20  | -8.35  | -7.73  |
| (HCONH <sub>2</sub> ) <sub>2</sub>             | -15.27  | -15.83 | -15.36  | -14.91 | -15.36 | -14.39 | -16.30 | -16.77 |
| (HCOOH) <sub>2</sub>                           | -18.32  | -18.18 | -18.16  | -15.50 | -16.85 | -16.01 | -19.98 | -20.51 |
| DI6                                            |         |        |         |        |        |        |        |        |
| HCl-HCl                                        | -2.26   | -2.56  | -2.71   | -3.74  | -3.3   | -3.15  | -1.32  | -1.28  |
| H <sub>2</sub> S-HCl                           | -3.67   | -4.19  | -4.41   | -5.83  | -5.19  | -4.98  | -3     | -2.8   |
| CH <sub>3</sub> Cl-HCl                         | -3.98   | -4.49  | -4.81   | -6.59  | -5.67  | -5.36  | -3.6   | -2.5   |
| CH <sub>3</sub> SH-HCN                         | -3.96   | -4.25  | -4.52   | -5.46  | -4.71  | -4.29  | -2.63  | -3.28  |
| CH <sub>3</sub> SH-HCl                         | -5.34   | -6.13  | -6.56   | -8.84  | -7.61  | -7.22  | -5.79  | -3.99  |
| DHB                                            |         |        |         |        |        |        |        |        |
| AlH-HF                                         | -6.56   | -6.85  | -7.31   | -7.71  | -7.05  | -6.77  | -5.11  | -4.98  |
| LiH-HCl                                        | -11.8   | -13.28 | -13.53  | -14.93 | -13.9  | -13.6  | -11.92 | -12.41 |
| LiH-HF                                         | -14.1   | -14.74 | -15.22  | -14.75 | -14.37 | -13.86 | -14.12 | -14.66 |
| MgH <sub>2</sub> -HCl                          | -5.08   | -5.72  | -5.93   | -7.45  | -6.7   | -6.49  | -3.78  | -3.99  |
| MgH <sub>2</sub> -HF                           | -7.38   | -7.66  | -8.05   | -8.21  | -7.66  | -7.39  | -6.66  | -6.58  |
| BeH <sub>2</sub> -HCl                          | -2.44   | -2.7   | -2.81   | -3.88  | -3.33  | -3.15  | -1.35  | -1.43  |
| BeH <sub>2</sub> -HF                           | -3.66   | -3.72  | -3.96   | -4.2   | -3.85  | -3.45  | -2.82  | -2.94  |
| CT7                                            |         |        |         |        |        |        |        |        |
| C <sub>2</sub> H <sub>4</sub> -F <sub>2</sub>  | -1.19   | -1.6   | -2.05   | -3.02  | -1.93  | -1.34  | -4.79  | 0.43   |
| NF <sub>3</sub> -HNC                           | -1.85   | -1.99  | -2.46   | -3.6   | -2.57  | -2.01  | -1.42  | -0.33  |
| C <sub>2</sub> H <sub>4</sub> -Cl <sub>2</sub> | -2.6    | -4.14  | -5.09   | -8.96  | -6.73  | -6.1   | -8.02  | 0.11   |
| NH <sub>3</sub> -F <sub>2</sub>                | -1.86   | -2.06  | -2.91   | -3.1   | -2.23  | -1.66  | -3.07  | -0.21  |
| NF <sub>3</sub> -ClF                           | -2.03   | -2.44  | -3.43   | -4.96  | -3.54  | -2.95  | 0.5    | 0.18   |
| NF <sub>3</sub> -HF                            | -2.26   | -2.33  | -2.75   | -3.62  | -2.77  | -2.25  | -0.97  | -0.9   |
| C <sub>2</sub> H <sub>2</sub> -ClF             | -3.85   | -5.04  | -5.95   | -7.73  | -5.88  | -5.18  | -6.52  | -2.18  |
| HCN-ClF                                        | -4.87   | -5.8   | -6.89   | -7.93  | -6.54  | -5.95  | -5.33  | -3.3   |
| NH <sub>3</sub> -Cl <sub>2</sub>               | -5.13   | -5.87  | -7.18   | -8.75  | -7.47  | -7.07  | -7.63  | -3.33  |
| H <sub>2</sub> O-ClF                           | -5.22   | -5.69  | -6.73   | -6.3   | -5.68  | -5.28  | -5.47  | -4.57  |
| NH <sub>3</sub> -ClF                           | -2.03   | -2.44  | -3.43   | -4.96  | -7.7   | -9.33  | 0.50   | 0.18   |
| MAE                                            |         | 0.38   | 0.74    | 1.63   | 1.05   | 0.91   | 1.37   | 1.03   |
| MARE[%]                                        |         | 12.58  | 24.28   | 154.22 | 113.00 | 103.06 | 195.24 | 58.49  |

## 6 GL2 correlation energies

TABLE S12: The GL2 correlation energies obtained from exact and various semi-local energy expression (in mHa) calculated on top of self-consistent OEPx orbitals and orbital energies in fully uncontacted cc-pVTZ basis set. The last lines report the mean absolute error (MAE) and mean absolute relative error (MARE) calculated with respect exact GL2 data.

|                               | GL2      | PBE-GL2   | TPSS-GL2  | revTPSS-GL2 |
|-------------------------------|----------|-----------|-----------|-------------|
| He                            | -44.363  | -46.337   | -47.903   | -51.808     |
| Li                            | -39.994  | -57.796   | -56.165   | -60.445     |
| Be                            | -113.802 | -113.424  | -112.781  | -122.476    |
| B                             | -134.885 | -140.928  | -137.370  | -147.979    |
| C                             | -161.406 | -176.444  | -174.906  | -186.062    |
| N                             | -191.277 | -217.471  | -219.668  | -231.197    |
| O                             | -254.493 | -281.078  | -275.198  | -288.047    |
| F                             | -326.869 | -346.140  | -341.461  | -355.356    |
| Ne                            | -405.145 | -412.358  | -414.265  | -429.077    |
| BeH                           | -97.580  | -124.940  | -119.303  | -129.022    |
| OH                            | -340.946 | -349.456  | -342.201  | -357.811    |
| NH <sub>2</sub>               | -327.428 | -357.601  | -347.322  | -364.718    |
| NH                            | -254.288 | -286.955  | -277.722  | -292.113    |
| NO                            | -723.276 | -627.878  | -619.234  | -645.573    |
| PH <sub>2</sub>               | -422.856 | -746.632  | -735.950  | -764.970    |
| O <sub>2</sub>                | -770.850 | -666.881  | -657.954  | -684.674    |
| S <sub>2</sub>                | -918.035 | -1515.626 | -1501.791 | -1552.064   |
| SiH <sub>2</sub>              | -347.422 | -654.585  | -643.779  | -670.087    |
| C <sub>2</sub> H <sub>5</sub> | -601.636 | -738.081  | -717.140  | -753.425    |
| CH <sub>2</sub>               | -226.830 | -289.601  | -277.095  | -292.735    |
| CH <sub>3</sub>               | -287.709 | -359.285  | -346.147  | -365.085    |
| CN                            | -541.471 | -511.417  | -500.899  | -524.626    |
| COH                           | -670.735 | -619.500  | -610.582  | -638.332    |
| CH <sub>4</sub>               | -348.835 | -424.613  | -417.151  | -439.289    |
| LiF                           | -487.876 | -451.807  | -453.721  | -473.896    |
| Li <sub>2</sub>               | -137.012 | -164.787  | -162.619  | -177.591    |
| F <sub>2</sub>                | -875.886 | -744.616  | -744.887  | -773.967    |
| CO                            | -659.650 | -571.305  | -568.931  | -594.734    |
| CH <sub>2</sub>               | -278.421 | -300.300  | -296.480  | -313.730    |
| H <sub>2</sub>                | -47.537  | -57.984   | -53.775   | -58.555     |
| CS                            | -781.015 | -1000.806 | -995.643  | -1033.483   |
| LiH                           | -86.328  | -100.313  | -100.918  | -109.990    |
| N <sub>2</sub>                | -708.486 | -595.291  | -592.501  | -618.479    |
| P <sub>2</sub>                | -910.610 | -1403.130 | -1396.442 | -1445.947   |
| NaCl                          | -729.401 | -1265.590 | -1264.610 | -1307.531   |
| H <sub>2</sub> O              | -433.049 | -418.419  | -416.233  | -434.688    |
|                               | MAE      | 105.03    | 101.89    | 110.28      |
|                               | MARE [%] | 21.99     | 15.45     | 18.87       |

## 7 Binding energies on top of HF orbitals

TABLE S13: Binding energies (in kcal/mol) from MP2, ISI and mISI methods calculated on top of HF orbitals. The last lines report the mean absolute error (MAE) and mean absolute relative error (MARE) calculated with respect CCSD(T) data. All calculation have been performed with fully uncontacted cc-pVTZ basis set.

|                                                | MP2    | ISI    | mISI   |
|------------------------------------------------|--------|--------|--------|
| WI                                             |        |        |        |
| He-Ne                                          | -0.03  | -0.05  | -0.02  |
| He-Ar                                          | -0.06  | -0.05  | -0.04  |
| Ne-Ne                                          | -0.06  | -0.08  | -0.04  |
| Ne-Ar                                          | -0.12  | -0.11  | -0.09  |
| CH <sub>4</sub> -Ne                            | -0.18  | -0.19  | -0.12  |
| C <sub>6</sub> H <sub>6</sub> -Ne              | -0.61  | -0.54  | -0.34  |
| CH <sub>4</sub> -CH <sub>4</sub>               | -0.56  | -0.49  | -0.28  |
| MAE                                            | 0.04   | 0.04   | 0.09   |
| HB6                                            |        |        |        |
| NH <sub>3</sub> -NH <sub>3</sub>               | -3.25  | -3.13  | -2.87  |
| HF-HF                                          | -4.59  | -4.68  | -4.51  |
| H <sub>2</sub> O-H <sub>2</sub> O              | -5.10  | -5.10  | -4.85  |
| NH <sub>3</sub> -H <sub>2</sub> O              | -6.66  | -6.54  | -6.24  |
| HF-HCN                                         | -7.86  | -7.83  | -7.54  |
| (HCONH <sub>2</sub> ) <sub>2</sub>             | -15.83 | -15.80 | -15.27 |
| (HCOOH) <sub>2</sub>                           | -18.18 | -18.35 | -17.84 |
| MAE                                            | 0.17   | 0.14   | 0.23   |
| DI6                                            |        |        |        |
| H <sub>2</sub> S-H <sub>2</sub> S              | -2.15  | -1.98  | -1.92  |
| Hcl-Hcl                                        | -2.56  | -2.39  | -2.33  |
| H <sub>2</sub> S-Hcl                           | -4.19  | -3.94  | -3.86  |
| CH <sub>3</sub> Cl-Hcl                         | -4.49  | -4.13  | -4.01  |
| CH <sub>3</sub> SH-HCN                         | -4.25  | -3.98  | -3.81  |
| CH <sub>3</sub> SH-Hcl                         | -6.13  | -5.67  | -5.52  |
| MAE                                            | 0.45   | 0.17   | 0.11   |
| DHB                                            |        |        |        |
| AlH-HCl                                        | -5.26  | -4.92  | -4.83  |
| AlH-HF                                         | -6.85  | -6.54  | -6.41  |
| LiH-HCl                                        | -13.28 | -12.78 | -12.65 |
| LiH-HF                                         | -14.74 | -14.44 | -14.16 |
| MgH <sub>2</sub> -HCl                          | -5.72  | -5.4   | -5.31  |
| MgH <sub>2</sub> -HF                           | -7.66  | -7.38  | -7.24  |
| BeH <sub>2</sub> -HCl                          | -2.7   | -2.49  | -2.42  |
| BeH <sub>2</sub> -HF                           | -3.72  | -3.59  | -3.39  |
| MAE                                            | 0.54   | 0.27   | 0.25   |
| CT7                                            |        |        |        |
| NF <sub>3</sub> -HCN                           | -1.24  | -1.2   | -1.00  |
| C <sub>2</sub> H <sub>4</sub> -F <sub>2</sub>  | -1.6   | -1.29  | -1.03  |
| NF <sub>3</sub> -HNC                           | -1.99  | -1.68  | -1.44  |
| C <sub>2</sub> H <sub>4</sub> -Cl <sub>2</sub> | -4.14  | -3.43  | -3.22  |
| NH <sub>3</sub> -F <sub>2</sub>                | -2.06  | -1.77  | -1.51  |
| NF <sub>3</sub> -ClF                           | -2.44  | -2.11  | -1.88  |
| NF <sub>3</sub> -HF                            | -2.33  | -2.04  | -1.80  |
| C <sub>2</sub> H <sub>2</sub> -ClF             | -5.04  | -4.47  | -4.21  |
| HCN-ClF                                        | -5.8   | -5.39  | -5.16  |
| NH <sub>3</sub> -Cl <sub>2</sub>               | -5.87  | -5.44  | -5.29  |
| H <sub>2</sub> O-ClF                           | -5.69  | -5.45  | -5.27  |
| NH <sub>3</sub> -ClF                           | -2.44  | -4.65  | -5.68  |
| MAE                                            | 0.55   | 0.48   | 0.57   |
| MAE                                            | 0.38   | 0.25   | 0.29   |
| MARE[%]                                        | 12.58  | 10.26  | 17.11  |
